# Supplementary material for: Rational modifications on champion porphyrin dye SM315 using different electron-withdrawing moieties toward high performance dye-sensitized solar cells
Source: Royal Society of Chemistry journal article supplement (doi:10.1039/c4cp03355h), 2014-09-30
Supplement: c4cp03355h1.pdf [file c4cp03355h1.pdf]

## Electronic Supplementary Information

**Rational modifications on champion porphyrin dye SM315 by using different  
electron-withdrawing moieties toward high performance dye-sensitized solar cells**

**Ji Zhang, Jian-Zhao Zhang, Hai-Bin Li, Yong Wu, Yun Geng\*, Zhong-Min Su\***

*Institute of Functional Material Chemistry, Faculty of Chemistry, Northeast Normal University, Chang Chun  
130024, Jilin, P. R. China.*

\*Corresponding author. Fax: +86-431-85684009

*E-mail addresses:* [gengy575@nenu.edu.cn](mailto:gengy575@nenu.edu.cn), [zmsu@nenu.edu.cn](mailto:zmsu@nenu.edu.cn)

## Contents

|                                                                                                           |    |
|-----------------------------------------------------------------------------------------------------------|----|
| Computational details for optimization of dye-(TiO <sub>2</sub> ) <sub>38</sub> system using Siesta ..... | 3  |
| Fig. S1 Initial structure of (TiO <sub>2</sub> ) <sub>38</sub> cluster in side and top view. ....         | 4  |
| Fig. S2 The optimized geometries of porphyrin dyes. ....                                                  | 5  |
| Fig. S3 Illustration of the frontier molecular orbitals. ....                                             | 7  |
| Fig. S4 Functional effects on the absorption spectrum. ....                                               | 9  |
| Fig. S5 Diffuse functions effects on the absorption spectrum. ....                                        | 10 |
| Fig. S6 Simulated absorption spectra of porphyrin dyes in PCM(ACN). ....                                  | 11 |
| Fig. S7 Solvent effects (THF or ACN) on the absorption spectrum. ....                                     | 12 |
| Fig. S8 The standard solar photo flux spectrum for AM1.5 irradiation. ....                                | 13 |
| Fig. S9 Illustration of distance (Å) between the dye cation hole and TiO <sub>2</sub> surface. ....       | 14 |
| Fig. S10 The distributions of the cation hole. ....                                                       | 15 |
| Fig. S11 Molecular structures of simplified dyes. ....                                                    | 16 |
| Fig. S12 Total and Partial Density of States (DOS) on TiO <sub>2</sub> . ....                             | 17 |
| Table S1                                                                                                  |    |
| Calculated absorption properties for <b>SM315</b> at different basis set level. ....                      | 18 |
| Table S2                                                                                                  |    |
| Calculated absorption properties for other porphyrin dyes. ....                                           | 19 |
| Table S3                                                                                                  |    |
| Calculated absorption properties for <b>SM315</b> in different solvent (THF or ACN). ....                 | 21 |
| Reference. ....                                                                                           | 22 |

## **Computational details for optimization of dye-(TiO<sub>2</sub>)<sub>38</sub> system using Siesta**

The optimization of dye/(TiO<sub>2</sub>)<sub>38</sub> systems were performed by means of SIESTA package, employing norm-conserving pseudopotentials (Troullier–Martins nonlocal form) and localized atomic orbitals as basis set.<sup>1-3</sup> The dye-(TiO<sub>2</sub>)<sub>38</sub> structure was considered fully relaxed when the magnitude of forces on the atoms was smaller than 0.04 eV/Å. Standard DFT using the general gradient approximation (GGA) of Perdew, Burke, and Ernzerhof (PBE)<sup>4</sup> and double- $\zeta$  plus polarization (DZP) basis set with an equivalent real-space mesh cutoff 250 Ry were used to optimize the geometries of the studied systems in this work.

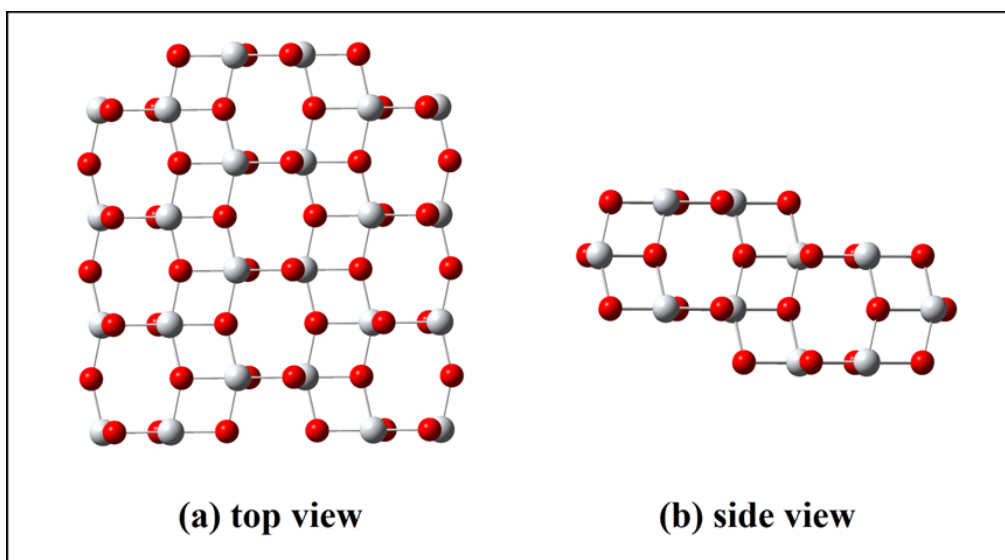

Fig. S1. Initial structure of  $(\text{TiO}_2)_{38}$  cluster in side and top view.

| Dye   | Front view                                                                          | Side view                                                                                      |
|-------|-------------------------------------------------------------------------------------|------------------------------------------------------------------------------------------------|
| SM315 | 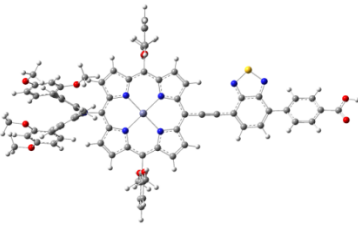   | <br>37.23°   |
| 1     |    | <br>37.75°   |
| 2     |    | <br>45.67°   |
| 3     |  | <br>30.97° |
| 4     |  | <br>46.95° |
| 5     |  | <br>4.35°  |
| 6     |  | <br>18.60° |

|    |                                                                                    |                                                                                                                             |
|----|------------------------------------------------------------------------------------|-----------------------------------------------------------------------------------------------------------------------------|
| 7  | 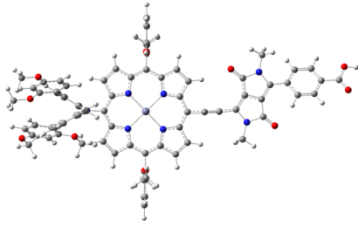  |  <p style="text-align: right;">26.96°</p> |
| 8  |   |  <p style="text-align: right;">39.06°</p> |
| 9  |   |  <p style="text-align: right;">46.15°</p> |
| 10 |  |  <p style="text-align: right;">0.70°</p> |

Fig. S2 The optimized geometries of reference dye **SM315** and designed dyes at PCM-M06/6-31G\*(LANL2DZ for Zn atom) level in THF solvent as well as the dihedral angle between the EWG and the acceptor part (benzoic acid).

| Dye   | HOMO                                                                                | LUMO                                                                                 |
|-------|-------------------------------------------------------------------------------------|--------------------------------------------------------------------------------------|
| SM315 | 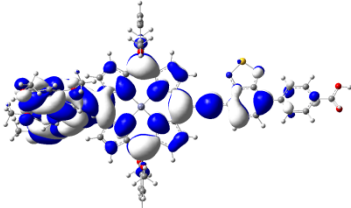   |    |
| 2     |    |    |
| 3     |    |    |
| 4     |   |   |
| 5     |  |  |
| 6     |  |  |
| 7     |  |  |

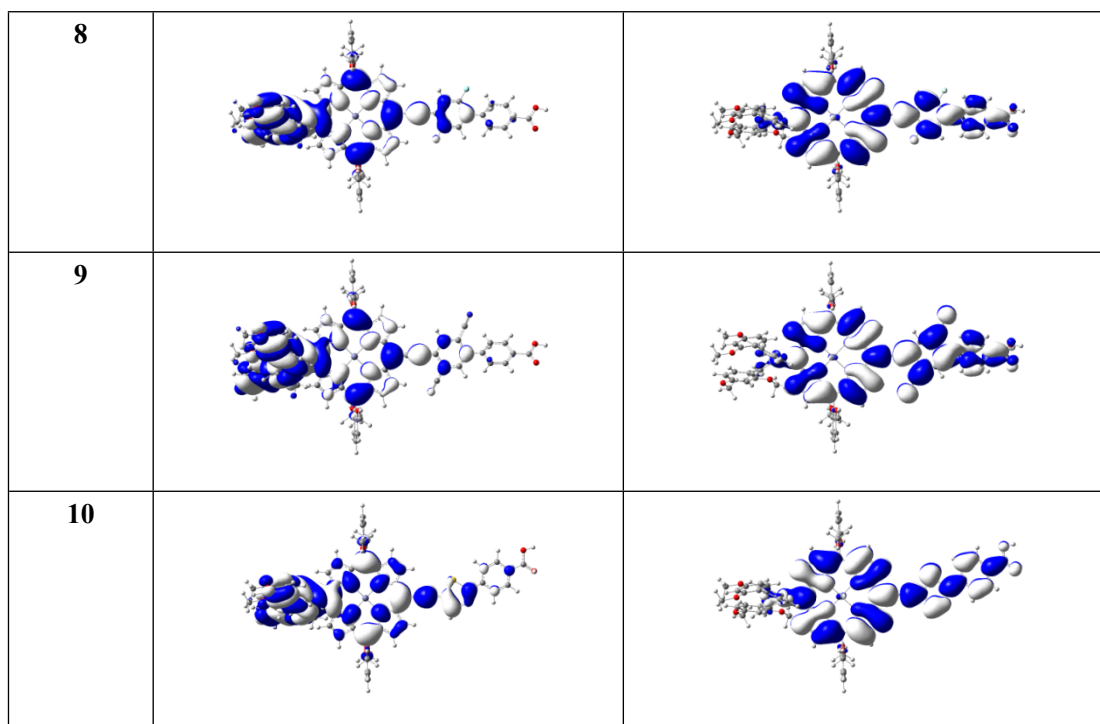

Fig. S3 Illustration of the frontier molecular orbitals of designed dyes at PCM-M06/6-311G\*\* level in THF solvent with iso-surface of 0.01 au.



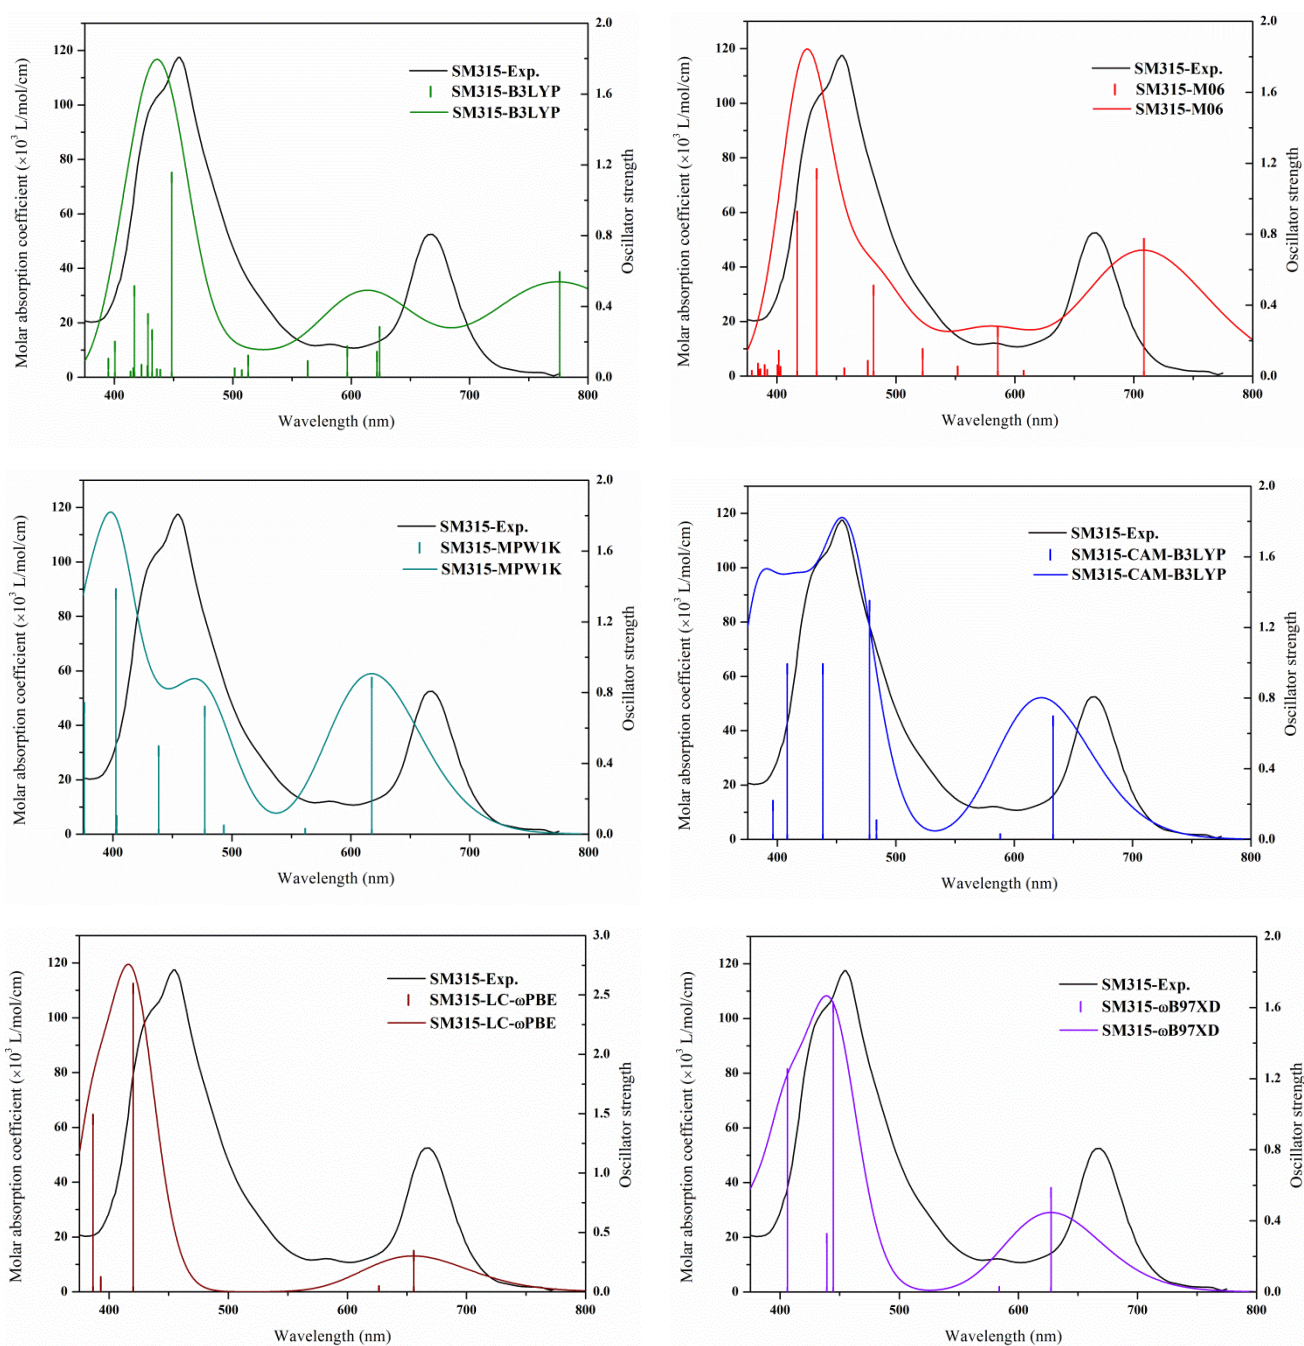

Fig. S4 The experimental spectrum (in THF) of **SM315** (taken from ref.5), and the theoretical electronic transitions as well as the simulated spectra under PCM-TD-Functional/6-31+G\* level. (The theoretical spectra were simulated with Multiwfn program,<sup>6, 7</sup> using Gaussian functions with full width at half maximum (FWHM) of 0.3 eV)

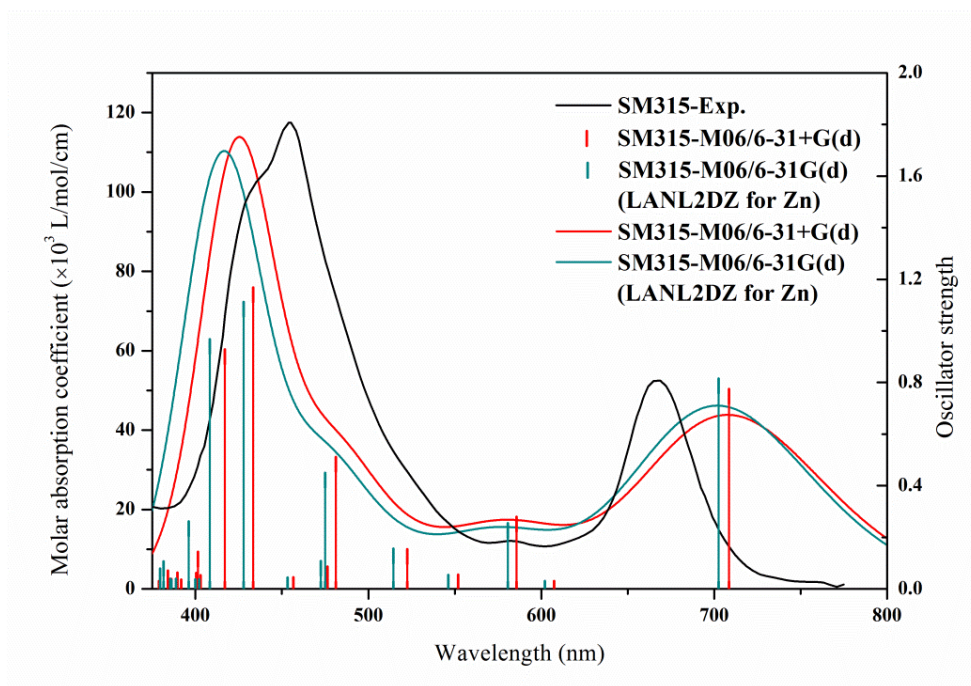

Fig. S5 The experimental spectrum (in THF) of **SM315** (taken from ref. 5), and the theoretical electronic transitions as well as the simulated spectra under PCM-TD-M06/Basis Set level.

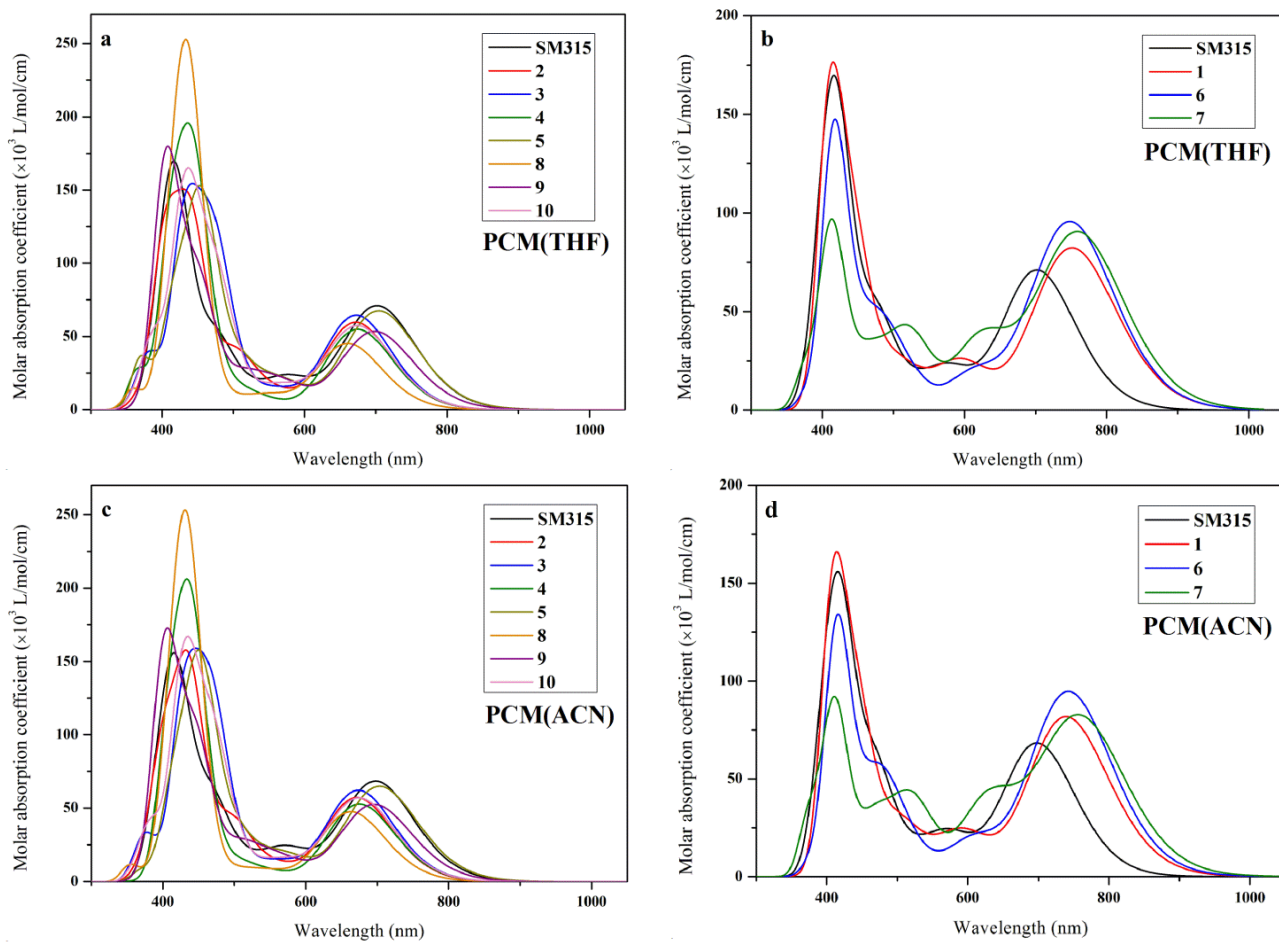

Fig. S6 Simulated absorption spectra of porphyrin dyes under study at PCM-TD- M06/6-31G\*(LANL2DZ for Zn atom) level.

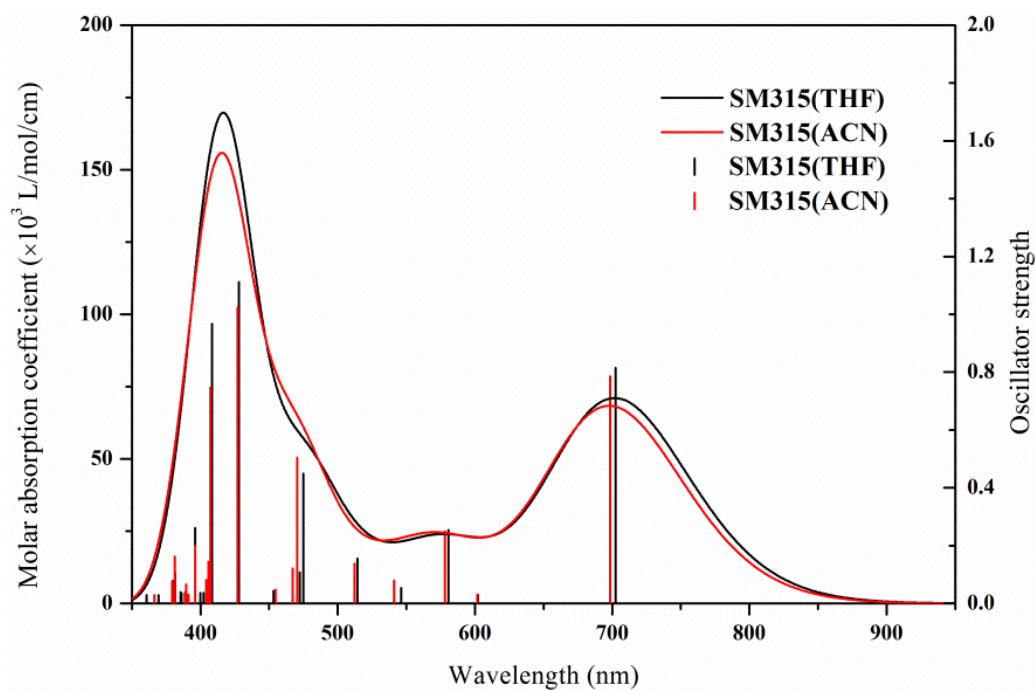

Fig. S7 The theoretical electronic transitions as well as the simulated spectra under PCM-TD-M06/6-31G\*(LANL2DZ for Zn atom) of SM315.

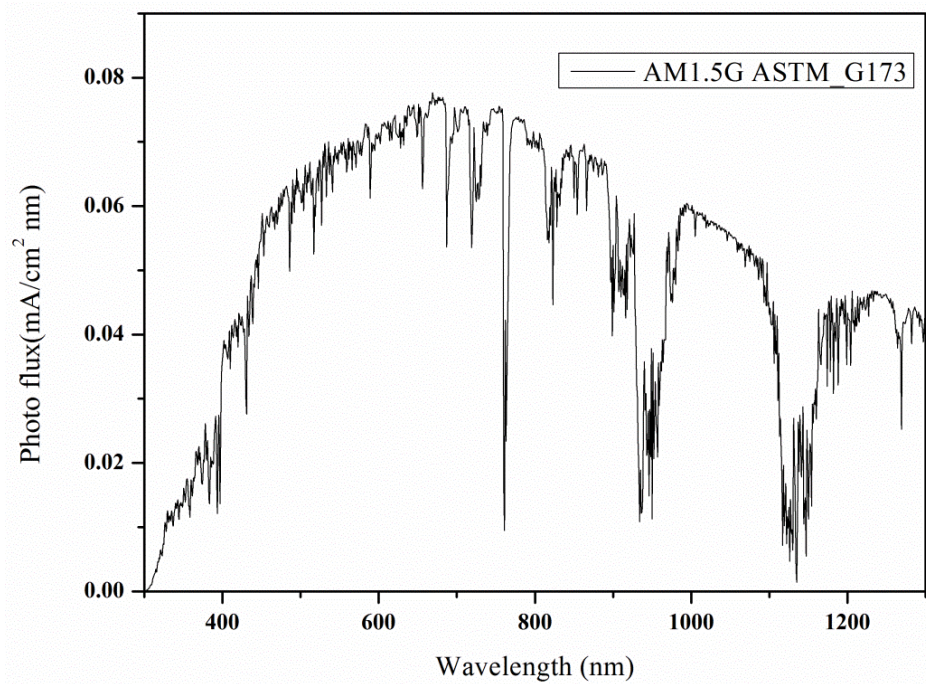

Fig. S8 The standard solar photo flux spectrum for AM1.5 irradiation

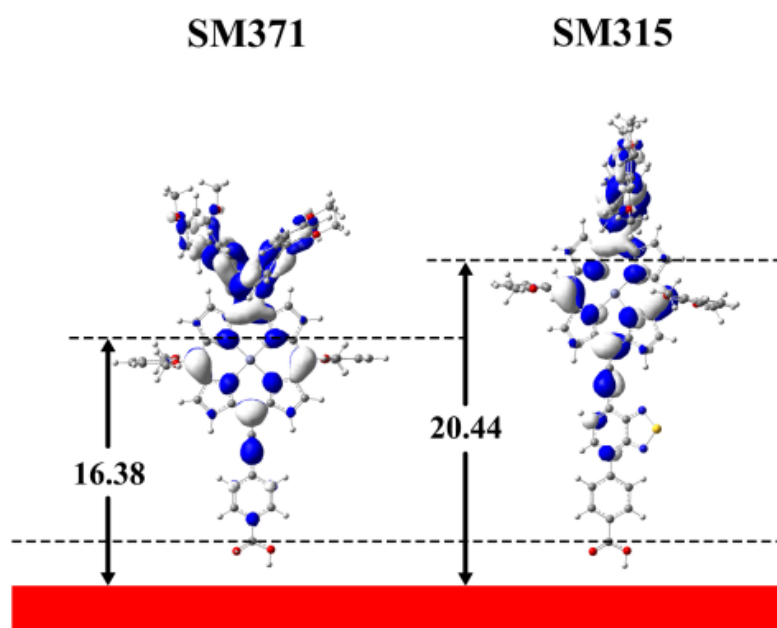

Fig. S9 Illustration of distance ( $\text{\AA}$ ) between the dye cation hole and the semiconductor surface.

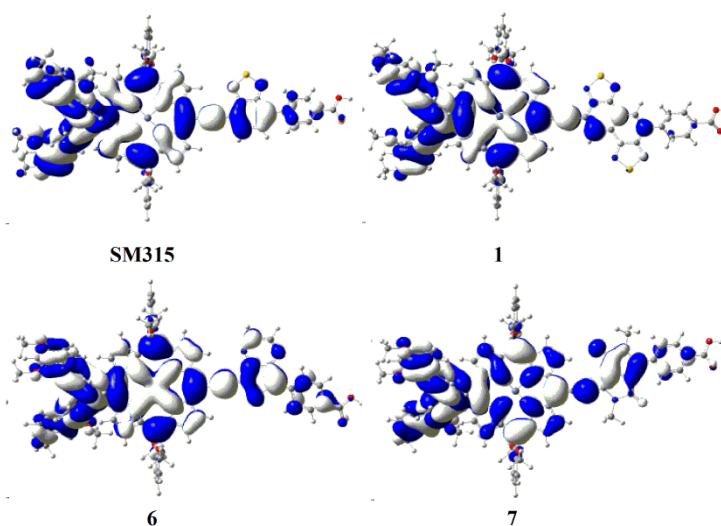

Fig. S10 The distributions of cation hole for SM315, 1, 6 and 7 at PCM-M06/6-31G\*(LANL2DZ for Zn atom) level in THF solvent with iso-surface of 0.01 au.

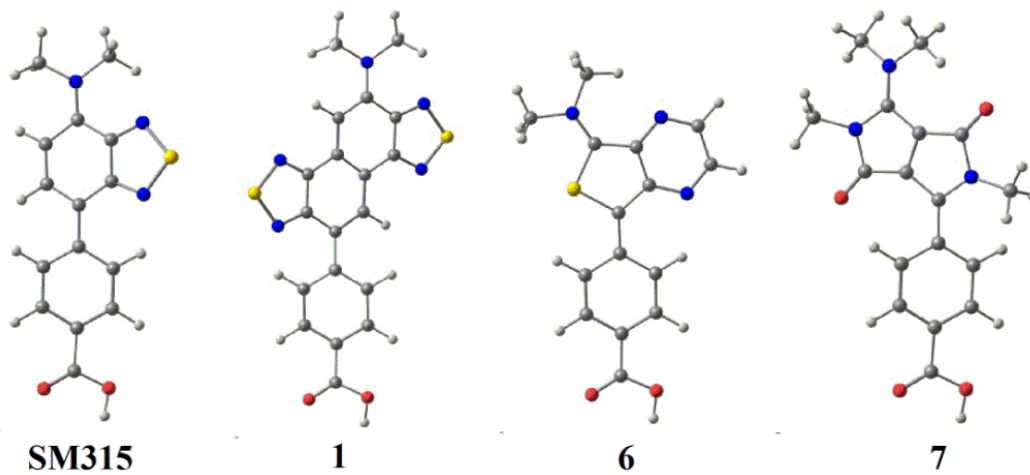

Fig. S11. Molecular structures of simplified sensitizers.



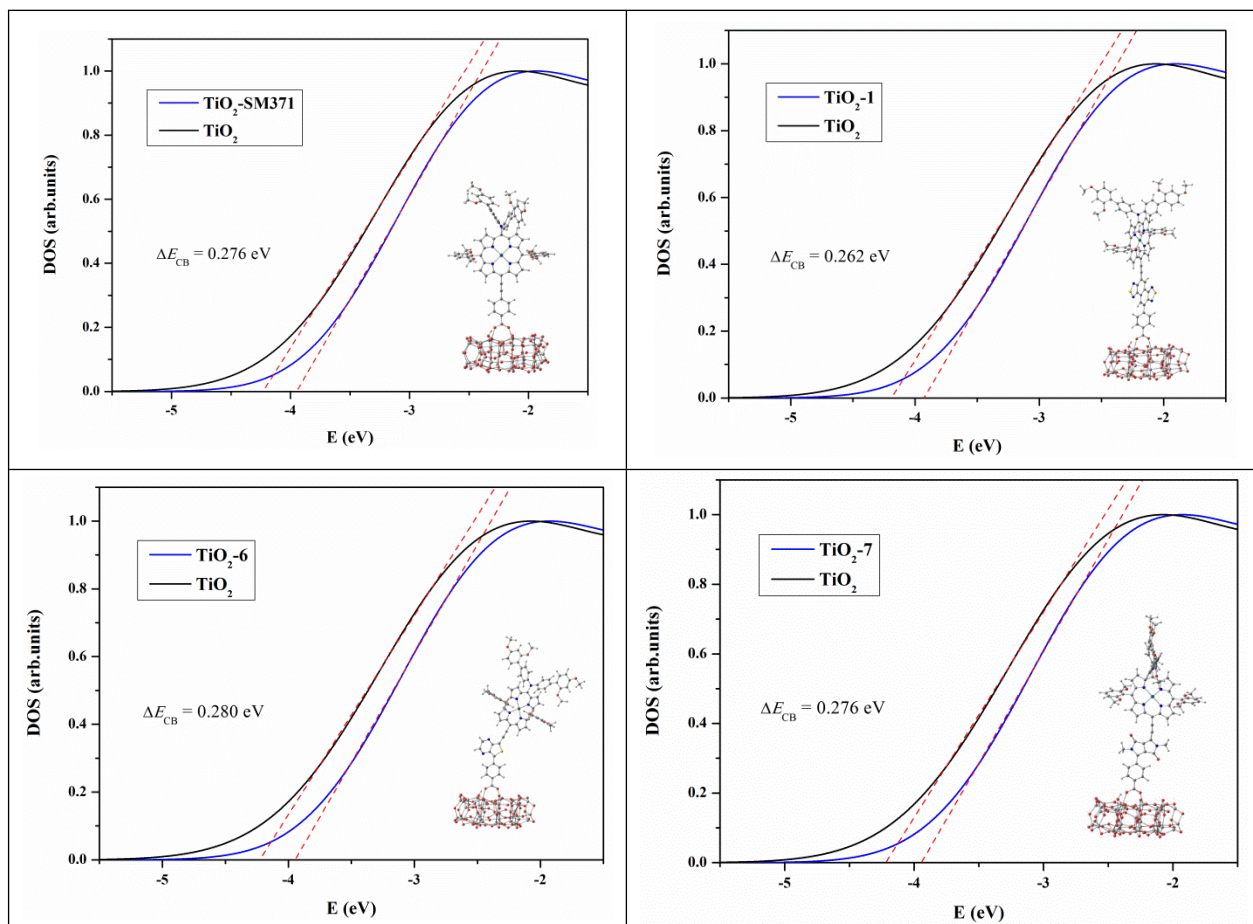

Fig. S12. Total and Partial Density of States (DOS) for porphyrin dyes adsorbed on  $(\text{TiO}_2)_{38}$  cluster. (black solid line)  $(\text{TiO}_2)_{38}$  cluster DOS, (blue solid line) PDOS,  $(\text{TiO}_2)_{38}$  cluster contribution to the total DOS. The red dash lines intercepts with the energy axis correspond to the calculated CB edges. And Charge displacement curve for dye- $(\text{TiO}_2)_{38}$  systems in acetonitrile solution under PCM-B3LYP/SVP level in ACN solvent.

Table S1

Computed absorption wavelength ( $\lambda_{\text{abs}}$ , nm/  $E_x$ , eV), oscillator strength ( $f$ ), transition nature and configuration as well as the available experimental data for the experimental reported dye **SM315** at TD-PCM-M06/Basis Set level in THF solvent ( $\epsilon$  represents molar absorption coefficient; H=HOMO,L=LUMO,L+1=LUMO+1,etc.)

| SM315 | Exp.         | PCM-TD-M06/6-31G*<br>(LANL2DZ for Zn atom)                              |                                                                                | PCM-TD-M06/6-31+G*           |                                                                               |
|-------|--------------|-------------------------------------------------------------------------|--------------------------------------------------------------------------------|------------------------------|-------------------------------------------------------------------------------|
|       |              | $\lambda_{\text{abs}}/E_x/f$<br>( $10^3 \text{ M}^{-1}\text{cm}^{-1}$ ) | Transition nature<br>and configuration                                         | $\lambda_{\text{abs}}/E_x/f$ | Transition nature<br>and configuration                                        |
| A1    | 668/1.86/53  | 702/1.77/<br>0.7867                                                     | S <sub>0</sub> -S <sub>1</sub><br>H→L (87%)                                    | 708/1.75/0.7462              | S <sub>0</sub> -S <sub>1</sub><br>H→L (87%)                                   |
| A2    | 581/2.13/12  | 580/2.14/<br>0.2263                                                     | S <sub>0</sub> -S <sub>3</sub><br>H-1→L(83%)                                   | 585/2.12/0.2502              | S <sub>0</sub> -S <sub>3</sub><br>H-1→L(82%)                                  |
| A3    | 454/2.73/117 | 428/2.90/<br>1.0835                                                     | S <sub>0</sub> -S <sub>9</sub><br>H-1→L+1(30%) H-<br>2→L+2(26%)<br>H-7→L (21%) | 433/2.86/1.1396              | S <sub>0</sub> -S <sub>9</sub><br>H-1→L+1(33%)<br>H-2→L+2(30%)<br>H-7→L (17%) |
| A4    | 440/2.82/105 | 408/3.04/<br>0.9396                                                     | S <sub>0</sub> -S <sub>10</sub><br>H-2→L+1(49%) H-<br>1→L+2(34%)               | 416/2.98/0.9004              | S <sub>0</sub> -S <sub>10</sub><br>H-2→L+1(49%)<br>H-1→L+2(35%)               |

Table S2

Computed wavelength ( $\lambda$ , nm), excitation energy ( $E_x$ , eV), oscillator strength ( $f$ ) and major transition configurations of porphyrin sensitizers at TD-PCM-M06 /6-31G\* level in THF solvent

|                                            |                                                                                                                                                                                                                                                                                                                                                                                                                                                                                                                                                                                    |
|--------------------------------------------|------------------------------------------------------------------------------------------------------------------------------------------------------------------------------------------------------------------------------------------------------------------------------------------------------------------------------------------------------------------------------------------------------------------------------------------------------------------------------------------------------------------------------------------------------------------------------------|
| <p style="text-align: right;"><b>2</b></p> | <p><math>S_0</math>-<math>S_1</math> 672 nm 1.85 eV <math>f = 0.6619</math><br/> <math>H \rightarrow L</math> (89%)<br/> <math>S_0</math>-<math>S_3</math> 559 nm 2.22 eV <math>f = 0.1205</math><br/> <math>H-1 \rightarrow L</math> (81%)<br/> <math>S_0</math>-<math>S_7</math> 442 nm 2.80 eV <math>f = 0.8767</math><br/> <math>H-2 \rightarrow L+1</math> (22%) <math>H \rightarrow L+2</math> (19%)<br/> <math>S_0</math>-<math>S_{10}</math> 400 nm 3.10 eV <math>f = 0.7593</math><br/> <math>H-2 \rightarrow L+2</math> (64%) <math>H-1 \rightarrow L+1</math> (21%)</p> |
| <p style="text-align: right;"><b>3</b></p> | <p><math>S_0</math>-<math>S_1</math> 673 nm 1.84 eV <math>f = 0.7146</math><br/> <math>H \rightarrow L</math> (90%)<br/> <math>S_0</math>-<math>S_3</math> 561 nm 2.21 eV <math>f = 0.1459</math><br/> <math>H-1 \rightarrow L</math> (83%)<br/> <math>S_0</math>-<math>S_5</math> 473 nm 2.62 eV <math>f = 1.2022</math><br/> <math>H-2 \rightarrow L+1</math> (31%) <math>H \rightarrow L+2</math> (48%)<br/> <math>S_0</math>-<math>S_7</math> 433 nm 2.86 eV <math>f = 0.7997</math><br/> <math>H \rightarrow L+2</math> (43%) <math>H-2 \rightarrow L+1</math> (27%)</p>      |
| <p style="text-align: right;"><b>4</b></p> | <p><math>S_0</math>-<math>S_1</math> 674 nm 1.84 eV <math>f = 0.6105</math><br/> <math>H \rightarrow L</math> (91%)<br/> <math>S_0</math>-<math>S_3</math> 550 nm 2.25 eV <math>f = 0.0618</math><br/> <math>H-1 \rightarrow L</math> (77%)<br/> <math>S_0</math>-<math>S_6</math> 446 nm 2.78 eV <math>f = 1.6075</math><br/> <math>H-2 \rightarrow L+2</math> (42%) <math>H \rightarrow L+3</math> (25%)<br/> <math>S_0</math>-<math>S_{10}</math> 414 nm 2.99 eV <math>f = 0.7050</math><br/> <math>H-2 \rightarrow L+1</math> (28%) <math>H-1 \rightarrow L+2</math> (41%)</p> |

|                                             |                                                                                                                                                                                                                                                                                                                                                                                                                                                                                                                                                                         |
|---------------------------------------------|-------------------------------------------------------------------------------------------------------------------------------------------------------------------------------------------------------------------------------------------------------------------------------------------------------------------------------------------------------------------------------------------------------------------------------------------------------------------------------------------------------------------------------------------------------------------------|
| <p style="text-align: right;"><b>5</b></p>  | <p><math>S_0-S_1</math> 704 nm 1.76 eV <math>f = 0.7494</math><br/> <math>H \rightarrow L</math> (92%)<br/> <math>S_0-S_3</math> 571 nm 2.17 eV <math>f = 0.2008</math><br/> <math>H-1 \rightarrow L</math> (83%)<br/> <math>S_0-S_7</math> 458 nm 2.71 eV <math>f = 1.3668</math><br/> <math>H-2 \rightarrow L+2</math> (43%) <math>H \rightarrow L+3</math> (19%)<br/> <math>S_0-S_{11}</math> 414 nm 2.99 eV <math>f = 0.4049</math><br/> <math>H-2 \rightarrow L+1</math> (53%)</p>                                                                                 |
| <p style="text-align: right;"><b>8</b></p>  | <p><math>S_0-S_1</math> 661 nm 1.88 eV <math>f = 0.5003</math><br/> <math>H \rightarrow L</math> (91%)<br/> <math>S_0-S_3</math> 558 nm 2.22 eV <math>f = 0.0991</math><br/> <math>H-1 \rightarrow L</math> (79%)<br/> <math>S_0-S_5</math> 440 nm 2.82 eV <math>f = 2.1229</math><br/> <math>H-2 \rightarrow L+1</math> (51%) <math>H \rightarrow L+2</math> (18%)<br/> <math>S_0-S_7</math> 417 nm 2.97 eV <math>f = 0.9657</math><br/> <math>H-2 \rightarrow L</math> (32%) <math>H-1 \rightarrow L+1</math> (46%)</p>                                               |
| <p style="text-align: right;"><b>9</b></p>  | <p><math>S_0-S_1</math> 700 nm 1.77 eV <math>f = 0.5938</math><br/> <math>H \rightarrow L</math> (89%)<br/> <math>S_0-S_3</math> 570 nm 2.18 eV <math>f = 0.1904</math><br/> <math>H-1 \rightarrow L</math> (80%)<br/> <math>S_0-S_7</math> 454 nm 2.73 eV <math>f = 0.7464</math><br/> <math>H-2 \rightarrow L+1</math> (23%) <math>H-1 \rightarrow L+2</math> (31%)<br/> <math>S_0-S_9</math> 416 nm 2.98 eV <math>f = 0.9670</math><br/> <math>H-2 \rightarrow L+1</math> (23%) <math>H-1 \rightarrow L+2</math> (28%)<br/> <math>H \rightarrow L+3</math> (29%)</p> |
| <p style="text-align: right;"><b>10</b></p> | <p><math>S_0-S_1</math> 675 nm 1.84 eV <math>f = 0.6347</math><br/> <math>H \rightarrow L</math> (90%)<br/> <math>S_0-S_3</math> 567 nm 2.19 eV <math>f = 0.1741</math><br/> <math>H-1 \rightarrow L</math> (83%)<br/> <math>S_0-S_5</math> 475 nm 2.61 eV <math>f = 0.9364</math><br/> <math>H-2 \rightarrow L+1</math> (24%) <math>H \rightarrow L+2</math> (55%)<br/> <math>S_0-S_7</math> 434 nm 2.85 eV <math>f = 1.0141</math><br/> <math>H \rightarrow L+2</math> (38%) <math>H-2 \rightarrow L+1</math> (32%)</p>                                               |

Table S3

Computed absorption wavelength ( $\lambda_{\text{abs}}$ , nm/  $E_x$ , eV), oscillator strength ( $f$ ), transition nature and configuration for **SM315** at TD-PCM-M06/6-31G\* (LANL2DZ for Zn atom) in THF or ACN solvent (H=HOMO,L=LUMO,L+1=LUMO+1,etc.)

| SM315 | THF                          |                                                                                | ACN                          |                                                                                |
|-------|------------------------------|--------------------------------------------------------------------------------|------------------------------|--------------------------------------------------------------------------------|
|       | $\lambda_{\text{abs}}/E_x/f$ | Transition nature and configuration                                            | $\lambda_{\text{abs}}/E_x/f$ | Transition nature and configuration                                            |
| A1    | 702/1.77/ 0.7867             | S <sub>0</sub> -S <sub>1</sub><br>H→L (87%)                                    | 698/1.78/0.7570              | S <sub>0</sub> -S <sub>1</sub><br>H→L (88%)                                    |
| A2    | 580/2.14/ 0.2263             | S <sub>0</sub> -S <sub>3</sub><br>H-1→L(83%)                                   | 578 /2.15/0.2215             | S <sub>0</sub> -S <sub>3</sub><br>H-1→L(83%)                                   |
| A3    | 428/2.90/ 1.0835             | S <sub>0</sub> -S <sub>9</sub><br>H-1→L+1(30%) H-<br>2→L+2(26%)<br>H-7→L (21%) | 427/2.91/0.9950              | S <sub>0</sub> -S <sub>9</sub><br>H-1→L+1(29%) H-<br>2→L+2(23%)<br>H-7→L (20%) |
| A4    | 408/3.04/ 0.9396             | S <sub>0</sub> -S <sub>10</sub><br>H-2→L+1(49%) H-<br>1→L+2(34%)               | 407/3.05/0.7177              | S <sub>0</sub> -S <sub>10</sub><br>H-2→L+1(40%) H-<br>1→L+2(24%)               |
| HOMO  | -5.02 eV                     |                                                                                | -5.09 eV                     |                                                                                |
| LUMO  | -2.73 eV                     |                                                                                | -2.79 eV                     |                                                                                |

1. P. Ordejón, E. Artacho and J. M. Soler, *Phys. Rev. B Condens. Matter. Mater. Phys.*, 1996, **53**, R10441-R10444.
2. M. S. José, A. Emilio, D. G. Julian, G. Alberto, J. Javier, O. Pablo and S.-P. Daniel, *J. Phys.: Condens. Matter*, 2002, **14**, 2745.
3. D. Sánchez-Portal, P. Ordejón, E. Artacho and J. M. Soler, *Int. J. Quantum Chem.*, 1997, **65**, 453-461.
4. J. P. Perdew, K. Burke and M. Ernzerhof, *Phys. Rev. Lett.*, 1996, **77**, 3865-3868.
5. S. Mathew, A. Yella, P. Gao, R. Humphry-Baker, F. E. CurchodBasile, N. Ashari-Astani, I. Tavernelli, U. Rothlisberger, K. NazeeruddinMd and M. Grätzel, *Nat Chem*, 2014, **6**, 242-247.
6. T. Lu and F. Chen, *J. Comput. Chem.*, 2012, **33**, 580-592.
7. T. Lu Multiwfn, Version 3.2, A Multifunctional Wavefunction Analyzer, see <http://multiwfn.codeplex.com>.
